# Supplementary material for: Combining empirical and mechanistic understanding of spruce bark beetle outbreak dynamics in the LPJ-GUESS (v4.1, r13130) vegetation model
Source: Copernicus journal article supplement (doi:10.5194/gmd-2024-239), 2025-01-15
Supplement: Supplementary file 1 [file gmd-2024-239-supplement.pdf]

**Table S1.** Parameters for the top-ranked model in terms of combined statistics of bias, RMSE and  $R^2$  for all four regions/countries together and for each region/country separately. For all four regions/countries together, also the parameter range for the 50 highest ranked combinations is shown (min\_50, max\_50). The  $k_0$  values are the results of the calibration, LPJ-GUESS was run with  $k_0$  of 0.003. The numbers in parenthesis is the order number (from smallest to largest) of the seven values tested within the full parameter range (Table 2).

**Table S1a.** Run with SSC, calibration data 2011-2019 for Austria and Switzerland included.

|             | $k_1$     | $k_2$    | $k_{gc\_min}$ | $k_{pyw}$ | $k_3$     | $k_4$    | $k_5$  | $k_0 \times 1000$ |
|-------------|-----------|----------|---------------|-----------|-----------|----------|--------|-------------------|
| All four    | 0.05 (4)  | 0.15 (1) | -1 (7)        | 0.25 (1)  | 0.08 (6)  | 0.4 (4)  | 14 (5) | 2.20              |
| min_50      | 0.005 (1) | 0.15 (1) | -1.25 (6)     | 0.25 (1)  | 0.005 (1) | 0.4 (4)  | 14 (5) |                   |
| max_50      | 0.5 (7)   | 0.15 (1) | -1 (7)        | 0.33 (2)  | 0.15 (7)  | 0.5 (5)  | 20 (6) |                   |
| S Sweden    | 0.012 (2) | 0.15 (1) | -1.5 (5)      | 1 (4)     | 0.009 (2) | 0.8 (7)  | 27 (7) | 0.0764            |
| Switzerland | 0.12 (5)  | 0.15 (1) | -1.25 (6)     | 1 (4)     | 0.15 (7)  | 0.8 (7)  | 14 (5) | 17.6              |
| Austria     | 0.012 (2) | 0.2 (2)  | -2.5 (1)      | 1 (4)     | 0.08 (6)  | 0.8 (7)  | 27 (7) | 0.0026            |
| NE France   | 0.005 (1) | 0.4 (5)  | -2.5 (1)      | 3 (6)     | 0.15 (7)  | 0.35 (3) | 20 (6) | 0.081             |

**Table S1b.** Run without SSC, calibration data 2011-2019 for Austria and Switzerland not included.

|             | $k_1$     | $k_2$    | $k_{gc\_min}$ | $k_{pyw}$ | $k_3$     | $k_4$    | $k_5$  | $k_0 \times 1000$ |
|-------------|-----------|----------|---------------|-----------|-----------|----------|--------|-------------------|
| All four    | 0.005 (1) | 0.15 (1) | -1 (7)        | 4 (7)     | 0.005 (1) | 0.65 (6) | 14 (5) | 0.144             |
| min_50      | 0.005 (1) | 0.15 (1) | -1 (7)        | 2 (5)     | 0.005 (1) | 0.5 (5)  | 14 (5) |                   |
| max_50      | 0.5 (7)   | 0.2 (2)  | -1 (7)        | 4 (7)     | 0.15 (7)  | 0.65 (6) | 20 (6) |                   |
| S Sweden    | 0.012 (2) | 0.15 (1) | -1.25 (6)     | 2 (5)     | 0.15 (7)  | 0.8 (7)  | 27 (7) | 0.140             |
| Switzerland | 0.005 (1) | 0.15 (1) | -1 (7)        | 0.25 (1)  | 0.15 (7)  | 0.4 (4)  | 27 (7) | 0.078             |
| Austria     | 0.12 (5)  | 0.35 (4) | -1 (7)        | 1 (4)     | 0.005 (1) | 0.5 (5)  | 20 (6) | 0.199             |
| NE France   | 0.012 (2) | 0.5 (7)  | -1 (7)        | 4 (7)     | 0.017 (3) | 0.65 (6) | 20 (6) | 0.272             |

10

**Table S1c.** Run without SSC, calibration data 2011-2019 for Austria and Switzerland included.

|             | $k_1$     | $k_2$    | $k_{gc\_min}$ | $k_{pyw}$ | $k_3$     | $k_4$    | $k_5$  | $k_0 \times 1000$ |
|-------------|-----------|----------|---------------|-----------|-----------|----------|--------|-------------------|
| All four    | 0.005 (1) | 0.15 (1) | -1.5 (5)      | 3 (6)     | 0.005 (1) | 0.65 (6) | 27 (7) | 0.010             |
| min_50      | 0.005 (1) | 0.15 (1) | -2 (3)        | 2 (5)     | 0.005 (1) | 0.65 (6) | 27 (7) |                   |
| max_50      | 0.5 (7)   | 0.15 (1) | -1 (7)        | 4 (7)     | 0.15 (7)  | 0.8 (7)  | 27 (7) |                   |
| S Sweden    | 0.012 (2) | 0.15 (1) | -1.25 (6)     | 2 (5)     | 0.15 (7)  | 0.8 (7)  | 27 (7) | 0.159             |
| Switzerland | 0.005 (1) | 0.15 (1) | -1 (7)        | 0.25 (1)  | 0.08 (6)  | 0.35 (3) | 27 (7) | 0.044             |
| Austria     | 0.12 (5)  | 0.2 (2)  | -2.5 (1)      | 4 (7)     | 0.05 (5)  | 0.65 (6) | 27 (7) | 0.025             |
| NE France   | 0.012 (2) | 0.5 (7)  | -1.25 (6)     | 4 (7)     | 0.05 (5)  | 0.5 (5)  | 20 (6) | 0.498             |

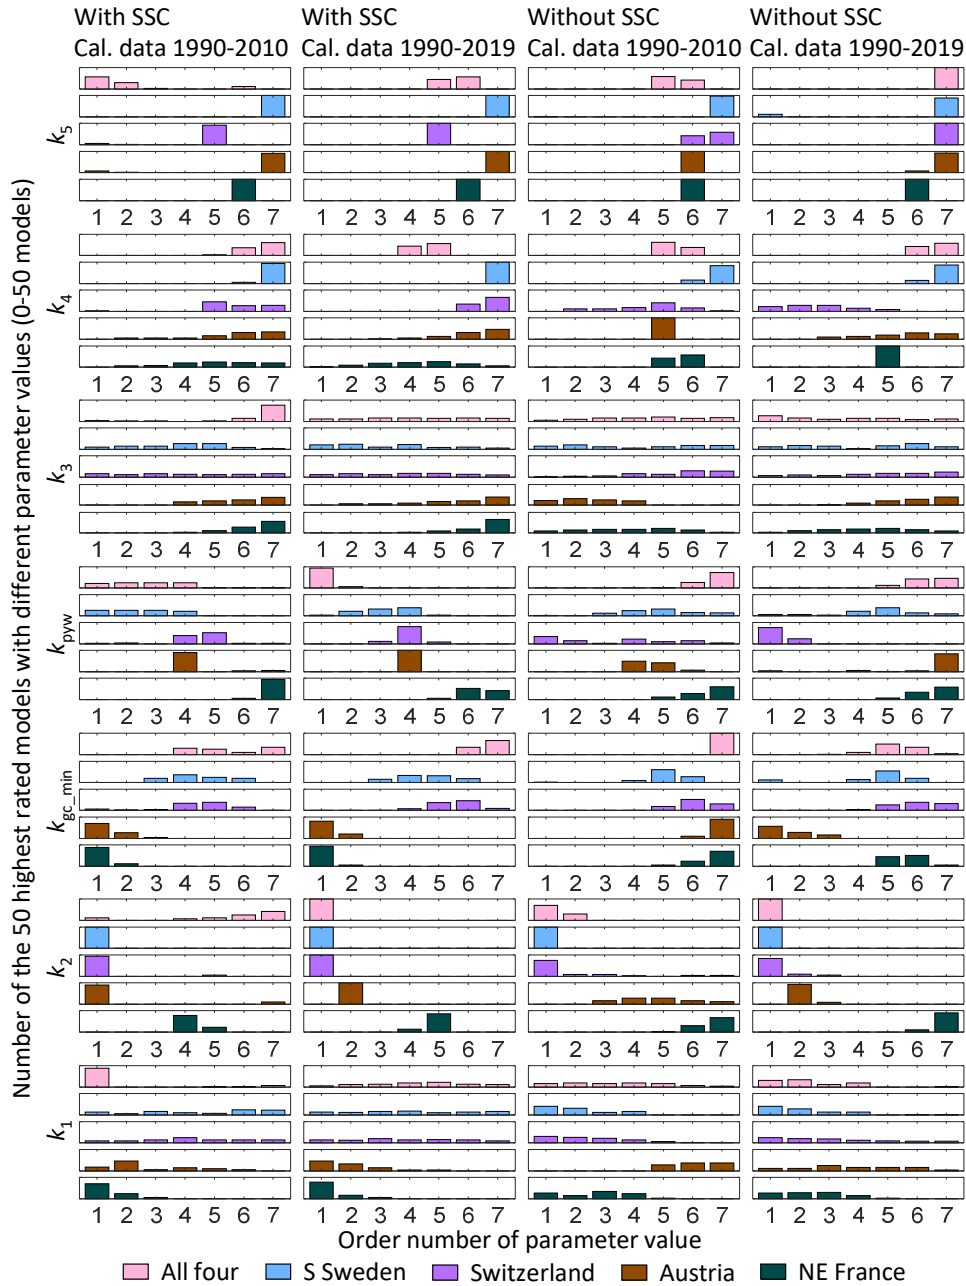

15 **Figure S1.** Histograms showing the number of the 50 highest ranked models, with the best combined statistics of bias, RMSE and  $R^2$ , divided in order number of the tested parameters (see Table 2) over all for regions/countries and separately for each region/country. The calibration was done both with and without salvage and sanitary cutting (SSC) and including SBB damage statistics for Austria and Switzerland 2011-2019.

20

**Table S2.** Statistics for different parameter settings; “default”, the top-ranked model in terms of combined statistics of bias, RMSE and  $R^2$  for all four regions/countries together and for each region/country separately.

**Table S2a.** Run with SSC, calibration data 2011-2019 for Austria and Switzerland included.

|             | Default |       |        | Combined all four |       |        | Region/country |       |        |
|-------------|---------|-------|--------|-------------------|-------|--------|----------------|-------|--------|
|             | $R^2$   | RMSE  | Bias   | $R^2$             | RMSE  | Bias   | $R^2$          | RMSE  | Bias   |
| All four    | 0.34    | 0.33% | 0.13%  | 0.38              | 0.23% | 0.03%  |                |       |        |
| S Sweden    | 0.54    | 0.33% | 0.25%  | 0.56              | 0.13% | 0.07%  | 0.74           | 0.09% | 0.03%  |
| Switzerland | 0.40    | 0.29% | 0.02%  | 0.46              | 0.27% | -0.11% | 0.47           | 0.27% | -0.01% |
| Austria     | 0.13    | 0.22% | 0.10%  | 0.27              | 0.22% | 0.12%  | 0.46           | 0.15% | 0.00%  |
| NE France   | 0.28    | 0.57% | -0.25% | 0.24              | 0.69% | -0.12% | 0.46           | 0.62% | -0.01% |

25

**Table S2b.** Run without SSC, calibration data 2011-2019 for Austria and Switzerland not included.

|             | Default |       |        | Combined all four |       |        | Region/country |       |       |
|-------------|---------|-------|--------|-------------------|-------|--------|----------------|-------|-------|
|             | $R^2$   | RMSE  | Bias   | $R^2$             | RMSE  | Bias   | $R^2$          | RMSE  | Bias  |
| All four    | 0.35    | 0.25% | 0.03%  | 0.41              | 0.22% | 0.01%  |                |       |       |
| S Sweden    | 0.68    | 0.23% | 0.14%  | 0.66              | 0.14% | 0.06%  | 0.81           | 0.08% | 0.01% |
| Switzerland | 0.32    | 0.31% | -0.11% | 0.35              | 0.31% | -0.14% | 0.45           | 0.32% | 0.00% |
| Austria     | 0.08    | 0.15% | 0.00%  | 0.25              | 0.14% | -0.06% | 0.32           | 0.13% | 0.02% |
| NE France   | 0.34    | 0.59% | -0.17% | 0.40              | 0.79% | 0.17%  | 0.45           | 0.67% | 0.00% |

**Table S2c.** Run without SSC, calibration data 2011-2019 for Austria and Switzerland included.

|             | Default |       |        | Combined all four |       |        | Region/country |       |        |
|-------------|---------|-------|--------|-------------------|-------|--------|----------------|-------|--------|
|             | $R^2$   | RMSE  | Bias   | $R^2$             | RMSE  | Bias   | $R^2$          | RMSE  | Bias   |
| All four    | 0.36    | 0.31% | 0.08%  | 0.46              | 0.26% | 0.07%  |                |       |        |
| S Sweden    | 0.68    | 0.30% | 0.18%  | 0.81              | 0.09% | 0.02%  | 0.81           | 0.08% | 0.02%  |
| Switzerland | 0.34    | 0.28% | -0.07% | 0.34              | 0.51% | 0.24%  | 0.50           | 0.31% | 0.00%  |
| Austria     | 0.05    | 0.21% | -0.01% | 0.43              | 0.16% | -0.06% | 0.50           | 0.15% | -0.03% |
| NE France   | 0.35    | 0.62% | -0.07% | 0.24              | 0.92% | 0.36%  | 0.43           | 0.68% | 0.03%  |

30

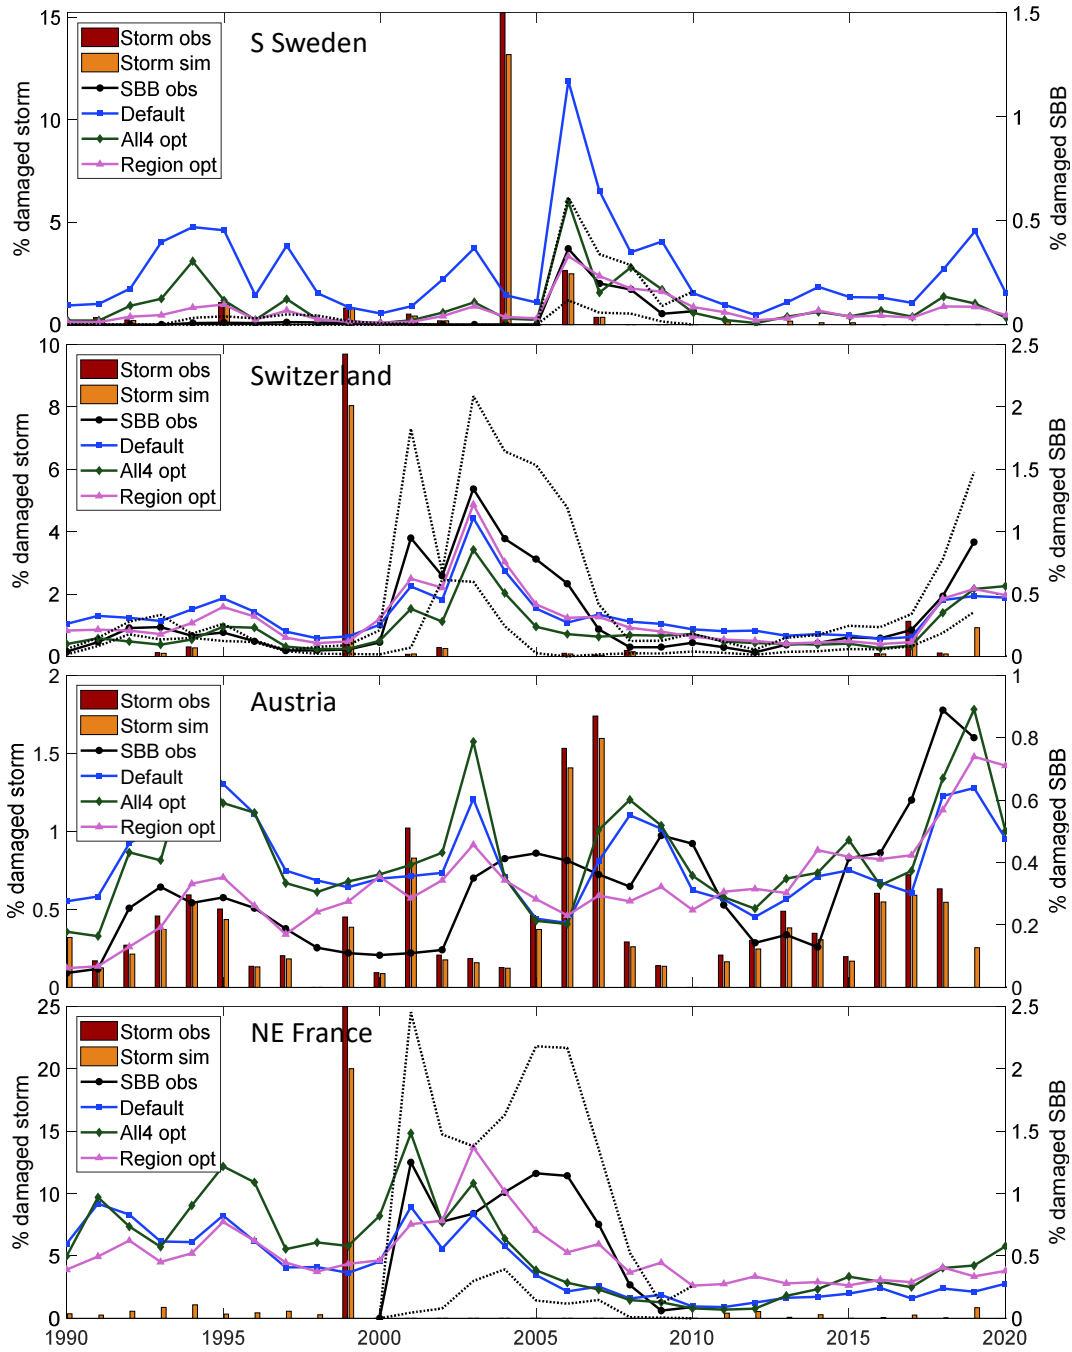

**Figure S2.** Observed and modelled fraction of spruce forest damaged by storm (left y-axis) and spruce bark beetle (SBB, right y-axis) in four regions/countries, with modelled SBB damage from different parameter settings (Table 2). Same as Figure 4 but includes also observed damage data in 2011-2019 for Switzerland and Austria in the calibration.

35



**Figure S3.** Observed and modelled fraction of spruce forest damaged by storm (left y-axis) and spruce bark beetle (SBB, right y-axis) in four regions/countries, with modelled SBB damage from different parameter settings (Table 2). Same as Figure 4 but the model was run without the functionality for salvage cutting of storm felled trees and sanitary cutting of infested trees.

40

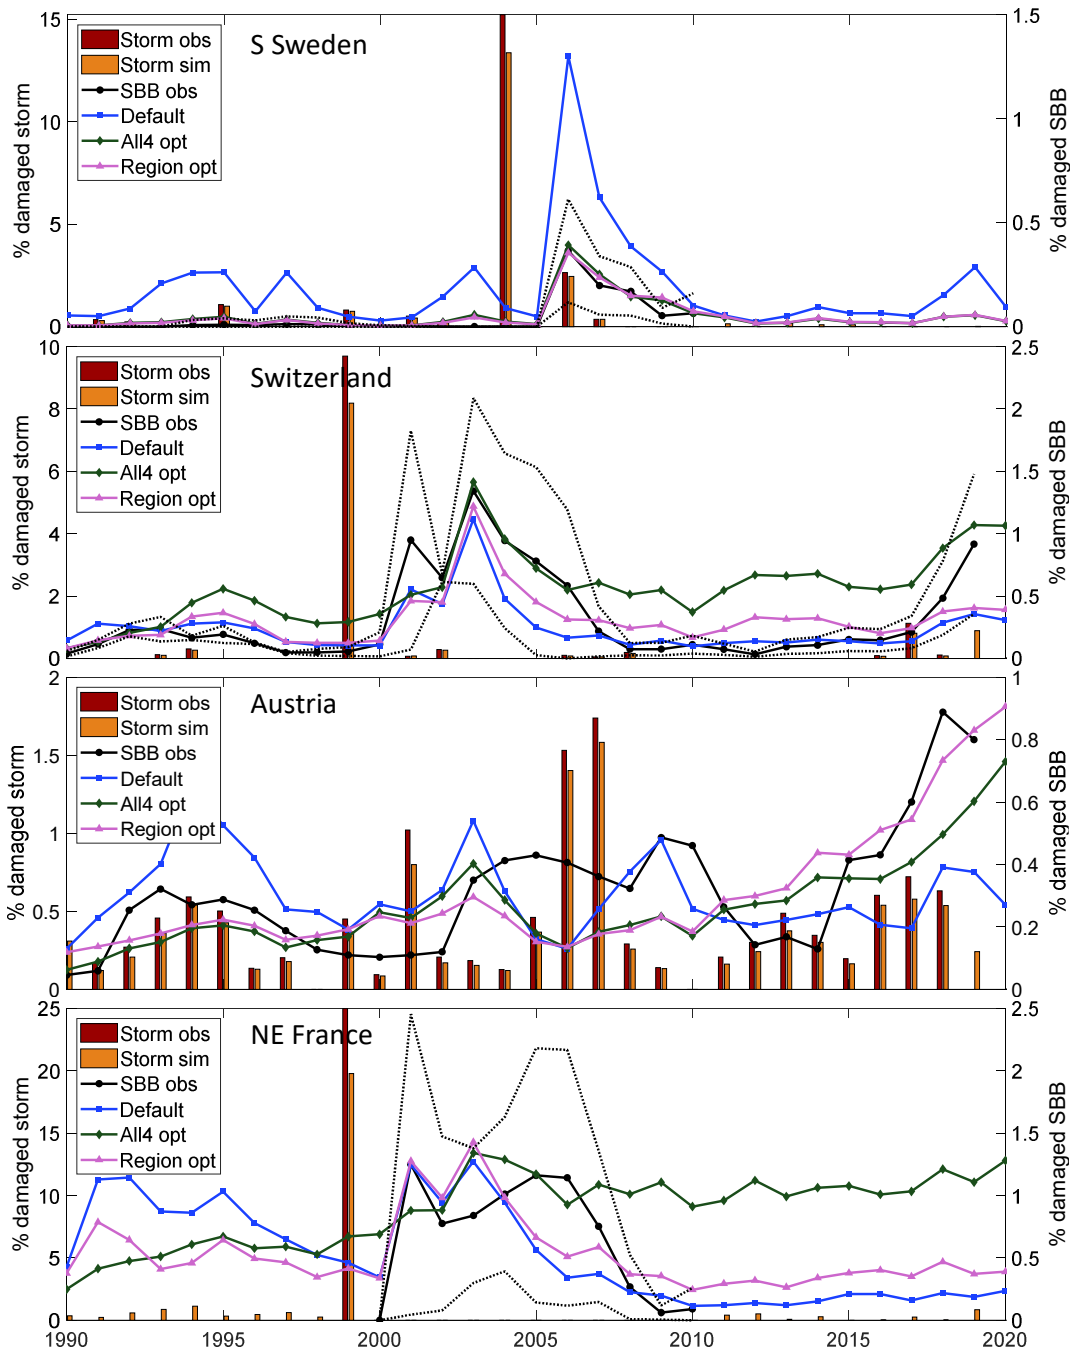

**Figure S4.** Observed and modelled fraction of spruce forest damaged by storm (left y-axis) and spruce bark beetle (SBB, right y-axis) in four regions/countries, with modelled SBB damage from different parameter settings (Table 2). Same as Figure S3 but includes also observed damage data in 2011-2019 for Switzerland and Austria in the calibration.

45

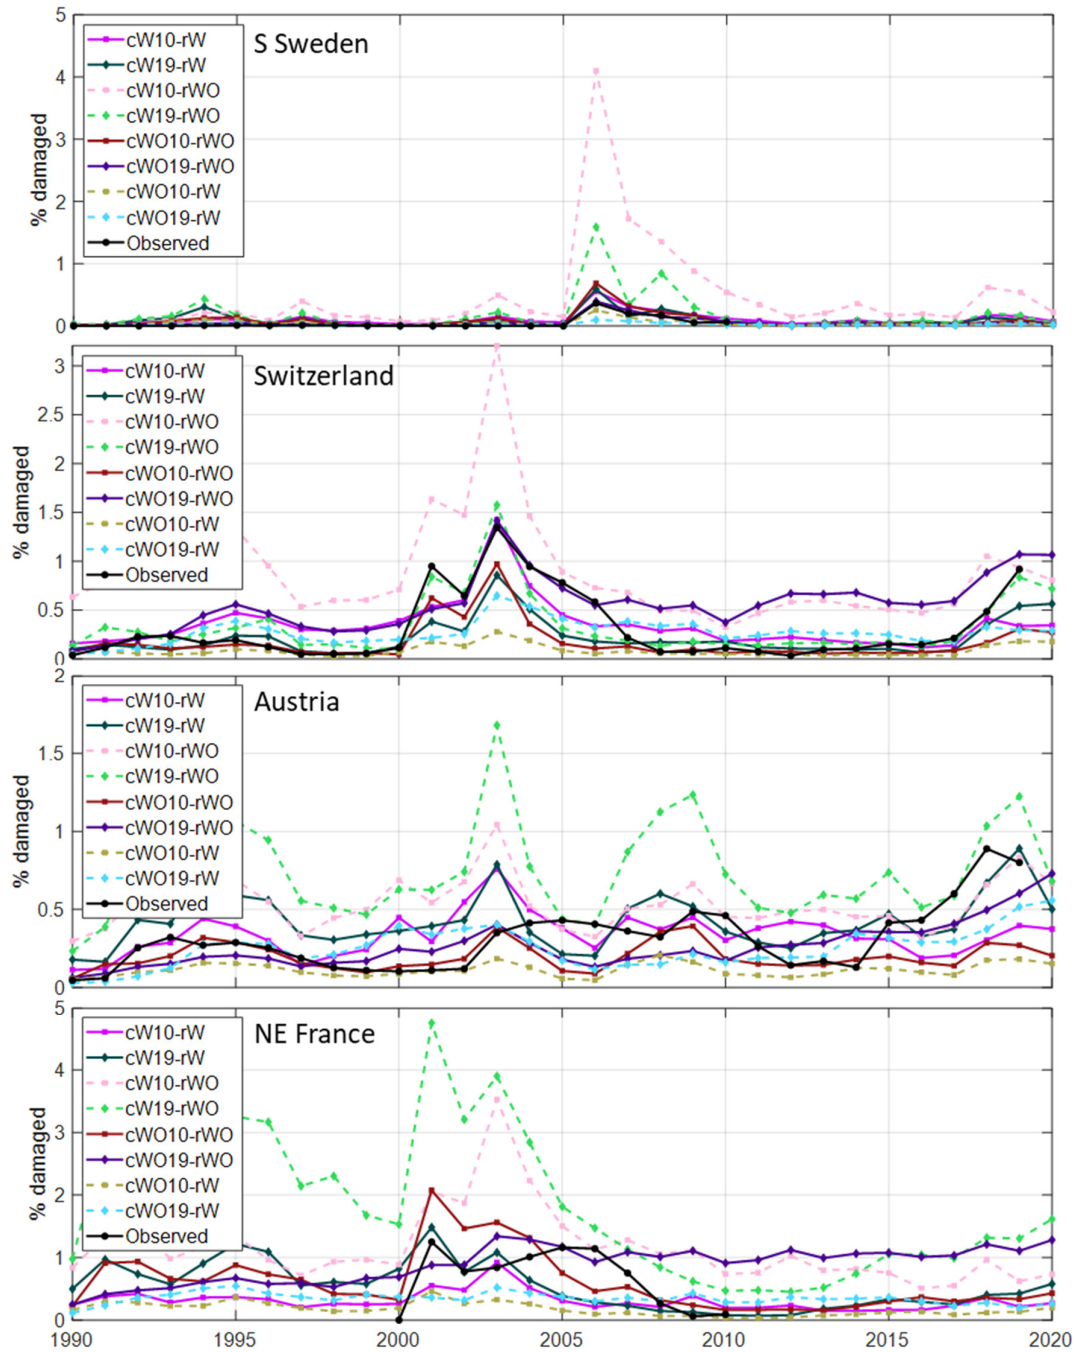

**Figure S5.** Test of the sensitivity to include salvage cutting of storm felled trees and sanitary cutting of infected trees (SSC) for the fraction of *Ips* killed trees. The calibrations with (cW) and without (cWO) SSC using only data for 1990-2010 (10) and including 2011-2019 data for Austria and Switzerland (19) were then run both with (rW) and without (rWO) SSC.
